# Supplementary material for: Low-grade carotid artery stenosis is associated with progression of brain atrophy and cognitive decline. The SMART-MR study
Source: PubMed Central journal article supplement — J Cereb Blood Flow Metab. 2022 Oct 16;43(2):309–18. doi: 10.1177/0271678X221133859 (PMC9903227; doi:10.1177/0271678x221133859), 2022-10-16
Supplement: sj-pdf-1-jcb-10.1177_0271678X221133859.pdf [file sj-pdf-1-jcb-10.1177_0271678X221133859.pdf]

# Supplementary Material

Supplementary Figure 1:

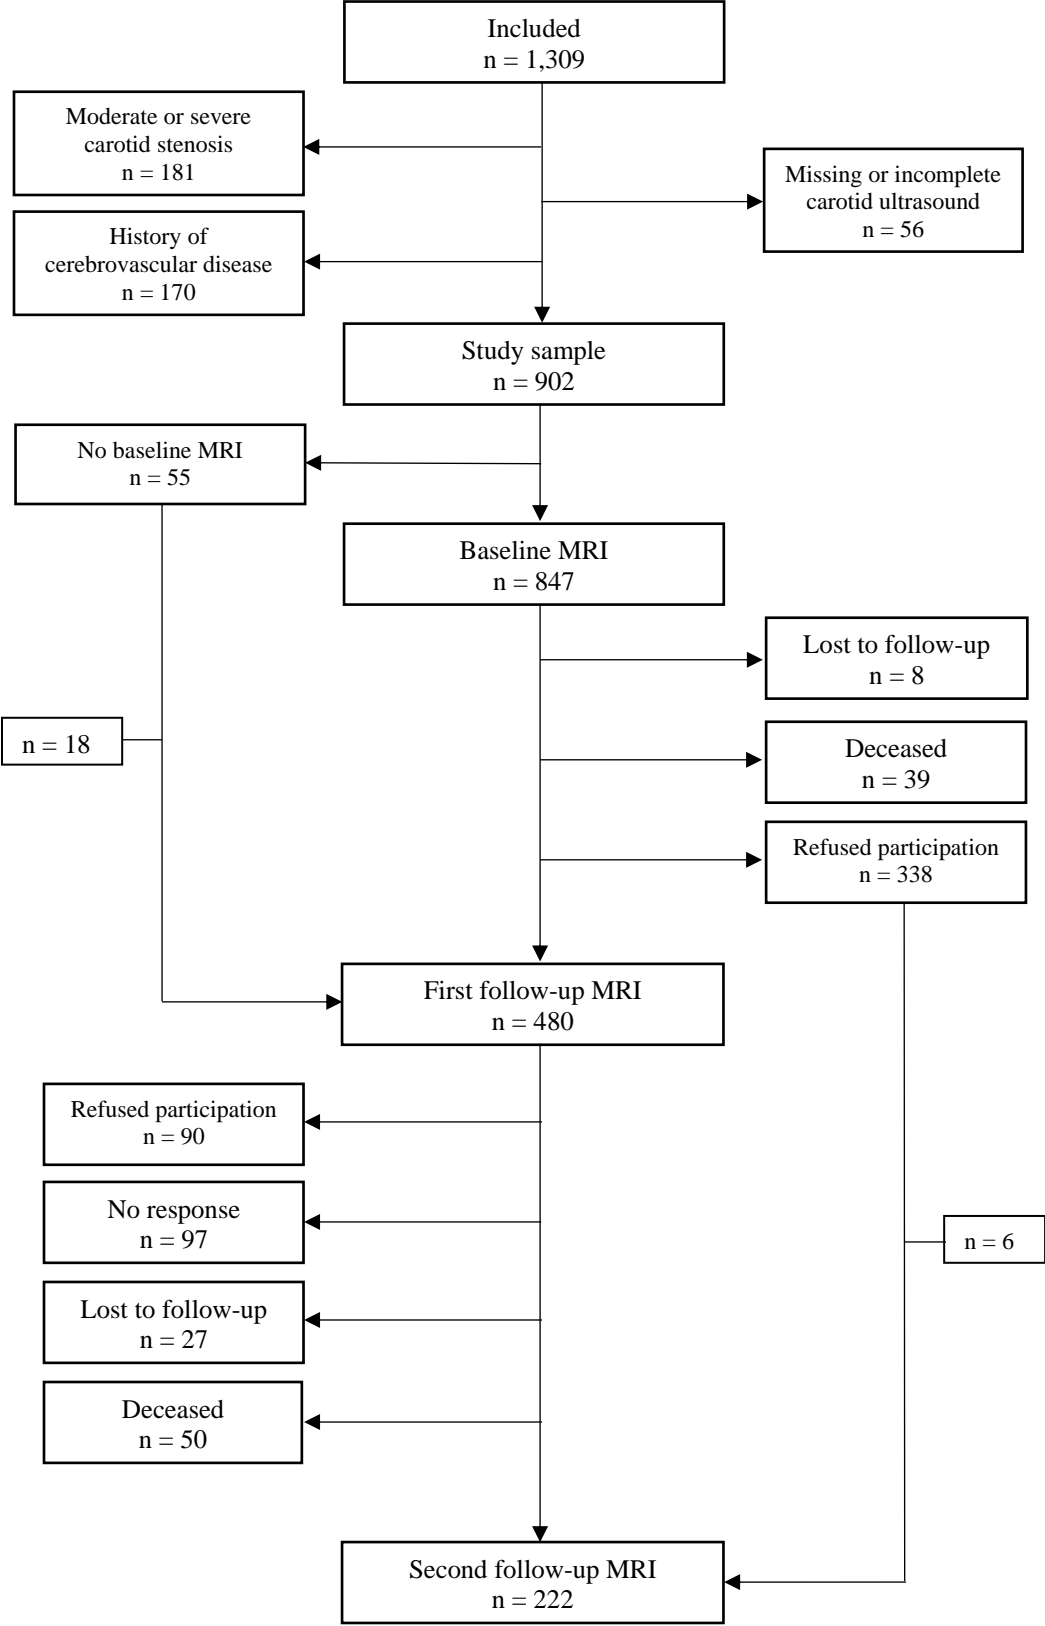

**Supplementary Figure 1.**

**Title:** Neuroimaging analysis flow diagram

**Legend:** Participation flow diagram of the 902 patients included in this study for neuroimaging analysis. The neuroimaging analysis included patients with consecutive and non-consecutive MRI measurements.

Supplementary Figure 2:

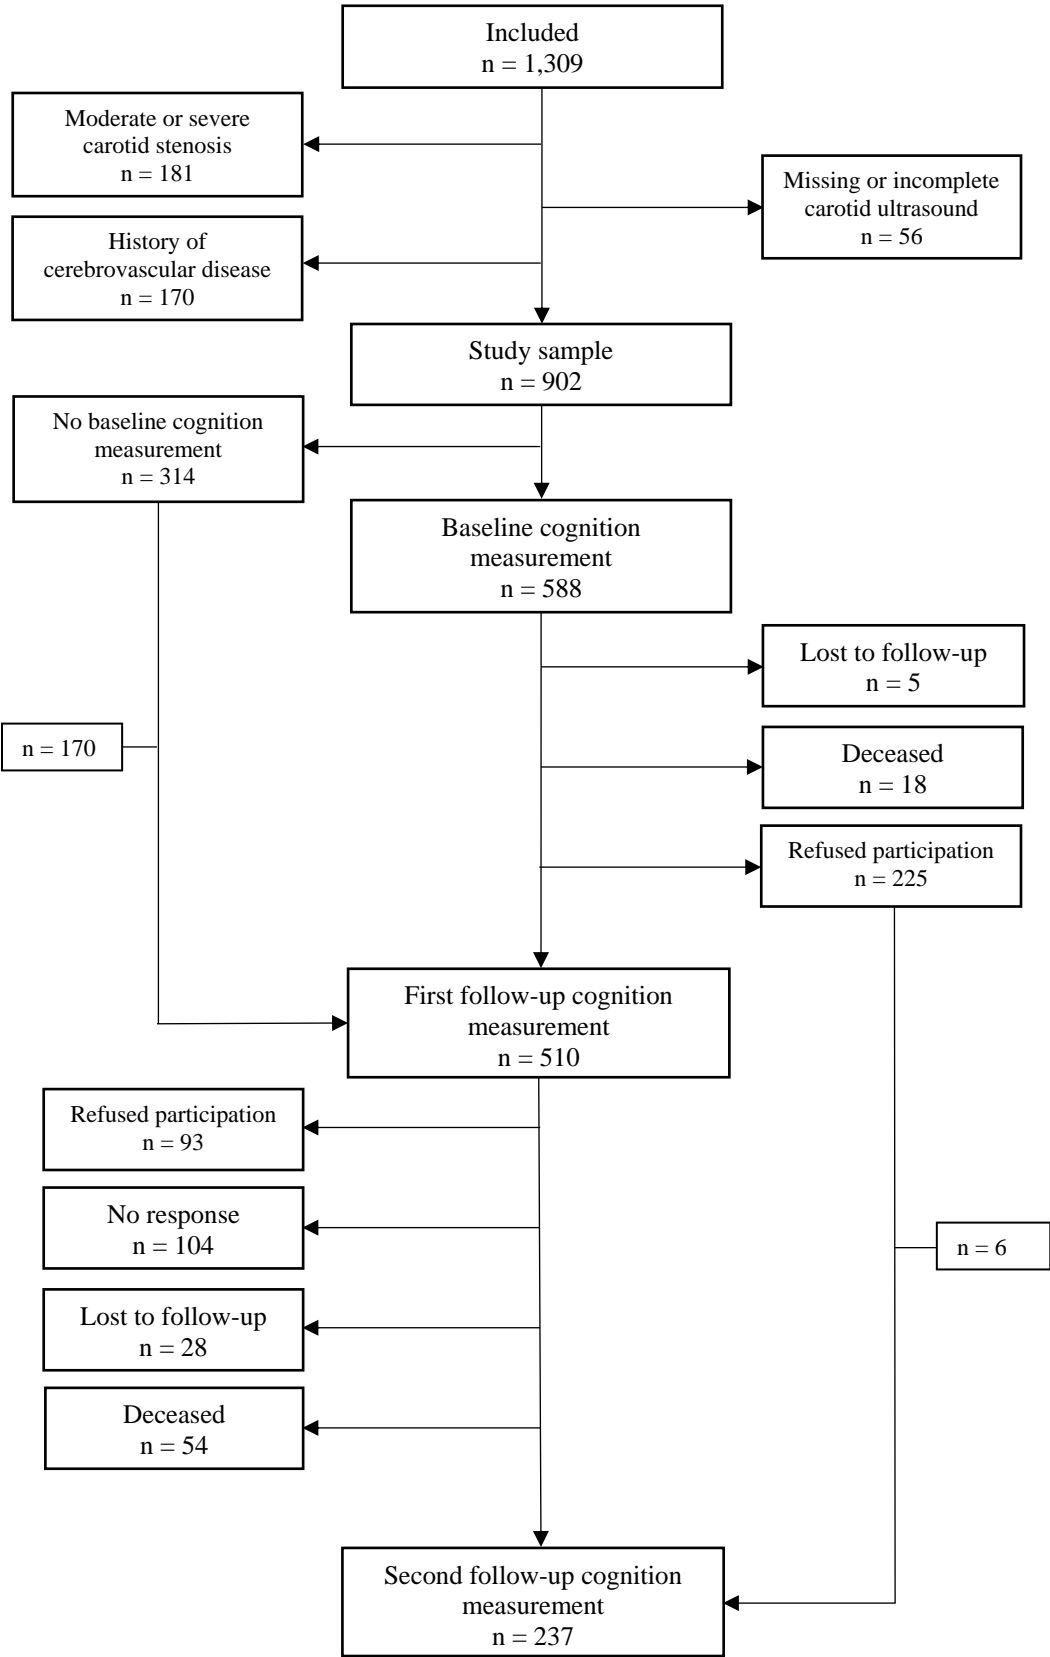

**Supplementary Figure 2.**

**Title:** Cognitive analysis flow diagram

**Legend:** Participation flow diagram of the 902 patients included in this study for cognitive analysis.

The cognitive analysis included patients with consecutive and non-consecutive cognitive functioning assessment.

### Supplementary Table 1

Output of the linear mixed-effects models with age of patients at each visit as the time variable, neuroimaging outcomes as dependent variables and low-grade carotid stenosis as independent variable.

|                       | BPF                    |                 | CSFF                   |                 | VF                     |                 | WMH <sup>b</sup>       |                 |
|-----------------------|------------------------|-----------------|------------------------|-----------------|------------------------|-----------------|------------------------|-----------------|
|                       | Estimate (95% CI)      | <i>p</i> -value |
| Intercept             | 79.6 (78.5 to 80.8)    | <0.001          | 18.4 (17.5 to 19.5)    | <0.001          | 1.99 (1.54 to 2.43)    | <0.001          | -3.34 (-3.94 to -2.74) | <0.001          |
| Time                  | -0.25 (-0.28 to -0.22) | <0.001          | 0.19 (0.16 to 0.22)    | <0.001          | 0.06 (0.05 to 0.07)    | <0.001          | 0.08 (0.07 to 0.10)    | <0.001          |
| LGCS <sup>a</sup>     | 0.07 (-0.30 to 0.40)   | 0.717           | 0.07 (-0.23 to 0.37)   | 0.661           | -0.10 (-0.24 to 0.03)  | 0.134           | 0.00 (-0.18 to 0.17)   | 0.987           |
| LGCS x Time           | -0.03 (-0.06 to -0.01) | 0.002           | 0.03 (0.01 to 0.05)    | 0.011           | 0.01 (0.002 to 0.02)   | 0.019           | 0.01 (-0.03 to 0.02)   | 0.162           |
| Sex <sup>c</sup>      | 0.93 (0.58 to 1.30)    | <0.001          | -0.57 (-0.88 to -0.25) | 0.001           | -0.36 (-0.49 to -0.22) | <0.001          | 0.29 (0.11 to 0.48)    | 0.002           |
| Large infarcts on MRI | -0.44 (-1.25 to 0.36)  | 0.283           | 0.20 (-0.52 to 0.92)   | 0.581           | 0.11 (-0.23 to 0.45)   | 0.524           | 0.20 (-0.23 to 0.62)   | 0.371           |
| MRI                   |                        |                 |                        |                 |                        |                 |                        |                 |
| Lacunae on MRI        | -0.61 (-1.09 to -0.13) | 0.013           | 0.19 (-0.24 to 0.61)   | 0.396           | 0.41 (0.21 to 0.61)    | <0.001          | 0.76 (0.50 to 1.01)    | <0.001          |
| Hypertension          | -0.08 (-0.36 to 0.20)  | 0.584           | 0.01 (-0.24 to 0.26)   | 0.920           | 0.09 (-0.02 to 0.20)   | 0.108           | 0.11 (-0.03 to 0.26)   | 0.125           |
| Diabetes mellitus     | -1.15 (-1.52 to -0.78) | <0.001          | 0.94 (0.62 to 1.27)    | <0.001          | 0.17 (0.03 to 0.32)    | 0.019           | 0.17 (-0.02 to 0.37)   | 0.075           |
| Body mass index       | 0.01 (-0.02 to 0.05)   | 0.483           | -0.01 (-0.04 to 0.02)  | 0.493           | -0.00 (-0.02 to 0.01)  | 0.684           | 0.01 (-0.01 to 0.01)   | 0.428           |
| Smoking pack years    | -0.01 (-0.02 to -0.01) | <0.001          | 0.01 (0.01 to 0.02)    | <0.001          | -0.00 (-0.00 to 0.00)  | 0.659           | 0.00 (-0.00 to 0.01)   | 0.435           |
| Alcohol use           |                        |                 |                        |                 |                        |                 |                        |                 |
| Current               | 0 (reference)          |                 | 0 (reference)          |                 | 0 (reference)          |                 | 0 (reference)          |                 |
| Former                | -0.50 (-0.98 to -0.02) | 0.041           | 0.40 (-0.02 to 0.83)   | 0.064           | 0.14 (-0.04 to 0.32)   | 0.118           | 0.15 (-0.10 to 0.39)   | 0.243           |

|           |                       |      |                       |       |                      |       |                        |       |
|-----------|-----------------------|------|-----------------------|-------|----------------------|-------|------------------------|-------|
| Abstinent | -0.00 (-0.40 to 0.40) | 0.99 | -0.12 (-0.48 to 0.24) | 0.504 | 0.10 (-0.06 to 0.25) | 0.224 | -0.04 (-0.25 to -0.17) | 0.692 |
|-----------|-----------------------|------|-----------------------|-------|----------------------|-------|------------------------|-------|

---

Results adjusted for sex, large infarcts on MRI, lacunes on MRI, hypertension, diabetes mellitus, body mass index, smoking pack years and alcohol use at baseline.

<sup>a</sup>No LGCS as the reference category.

<sup>b</sup>Natural log-transformed and standardized for total intracranial volume.

<sup>c</sup>Males as the reference category.

CI: confidence interval, LGCS: low-grade carotid stenosis, BPF: brain parenchymal fraction, CSFF: sulcal cerebrospinal fluid fraction, VF: ventricular fraction, WMH: white matter hyperintensity volume.

**Supplementary Table 2**

Output of the linear mixed-effects models with age of patients at each visit as the time variable, cognition domain-specific z-scores as dependent variables and low-grade carotid stenosis as independent variable.

|                       | Executive functioning    |                 | Memory                   |                 |
|-----------------------|--------------------------|-----------------|--------------------------|-----------------|
|                       | Estimate (95% CI)        | <i>p</i> -value | Estimate (95% CI)        | <i>p</i> -value |
| Intercept             | -0.84 (-1.37 to -0.32)   | 0.002           | -0.29 (-0.84 to 0.27)    | 0.311           |
| Time                  | -0.06 (-0.08 to -0.05)   | <0.001          | -0.06 (-0.04 to -0.08)   | <0.001          |
| LGCS <sup>a</sup>     | -0.06 (-0.20 to 0.09)    | 0.403           | 0.05 (-0.10 to 0.20)     | 0.496           |
| LGCS x Time           | -0.020 (-0.031 to -0.01) | <0.001          | -0.012 (-0.02 to -0.001) | 0.032           |
| Sex <sup>b</sup>      | 0.00 (-0.15 to 0.16)     | 0.976           | 0.33 (0.17 to 0.50)      | <0.001          |
| Education level       | 0.19 (0.16 to 0.22)      | <0.001          | 0.15 (0.12 to 0.19)      | <0.001          |
| Large infarcts on MRI | -0.05 (0.41 to 0.30)     | 0.778           | -0.08 (-0.45 to 0.29)    | 0.677           |
| Lacunae on MRI        | -0.11 (-0.33 to 0.11)    | 0.330           | -0.22 (-0.44 to 0.01)    | 0.062           |
| Hypertension          | 0.09 (-0.03 to 0.21)     | 0.160           | 0.08 (-0.05 to 0.20)     | 0.237           |
| Diabetes mellitus     | -0.06 (-0.22 to 0.10)    | 0.481           | -0.06 (-0.23 to 0.11)    | 0.502           |
| Body mass index       | -0.00 (-0.02 to 0.01)    | 0.837           | -0.01 (-0.03 to 0.00)    | 0.126           |
| Smoking pack years    | 0.00 (-0.00 to 0.01)     | 0.119           | -0.00 (-0.00 to 0.00)    | 0.706           |

Alcohol use

|           |                        |       |                        |       |
|-----------|------------------------|-------|------------------------|-------|
| Current   | 0 (reference)          |       | 0 (reference)          |       |
| Former    | 0.06 (-0.15 to 0.27)   | 0.600 | -0.09 (-0.31 to 0.13)  | 0.415 |
| Abstinent | -0.19 (-0.37 to -0.02) | 0.028 | -0.19 (-0.38 to -0.01) | 0.043 |

---

Results adjusted for sex, education level, practice effect, large infarcts on MRI, lacunes on MRI, hypertension, diabetes mellitus, body mass index, smoking pack years and alcohol use at baseline.

<sup>a</sup>No LGCS as the reference category.

<sup>b</sup>Males as the reference category.

CI: confidence interval, LGCS: low-grade carotid stenosis.



**Supplementary Table 3**

Joint Model Analysis with brain volumes and cognitive domains as dependent variables

|                              | Joint Models    |          | Association parameter |          |
|------------------------------|-----------------|----------|-----------------------|----------|
|                              | Estimate (SE)   | p values | Estimate              | p values |
| <b>BPF</b>                   |                 |          |                       |          |
| Intercept                    | 92.7 (0.46)     | <0.001   | -0.0374               | 0.0631   |
| Time                         | -0.21 (0.006)   | <0.001   |                       |          |
| LGCS <sup>a</sup>            | 2.18 (0.66)     | 0.001    |                       |          |
| LGCS x Time                  | -0.036 (0.01)   | 0.0013   |                       |          |
| <b>CSFF</b>                  |                 |          |                       |          |
| Intercept                    | 8.52 (0.41)     | <0.001   | 0.0485                | 0.0356   |
| Time                         | 0.16 (0.006)    | <0.001   |                       |          |
| LGCS <sup>a</sup>            | -1.55 (0.59)    | 0.0081   |                       |          |
| LGCS x Time                  | 0.0278 (0.01)   | 0.0057   |                       |          |
| <b>VF</b>                    |                 |          |                       |          |
| Intercept                    | -1.02 (0.16)    | <0.001   | 0.1428                | 0.0021   |
| Time                         | 0.05 (0.002)    | <0.001   |                       |          |
| LGCS <sup>a</sup>            | -0.67 (0.21)    | 0.0013   |                       |          |
| LGCS x Time                  | 0.0097 (0.004)  | 0.0124   |                       |          |
| <b>WMH</b>                   |                 |          |                       |          |
| Intercept                    | -7.60 (0.23)    | <0.001   | -0.0117               | 0.772    |
| Time                         | 0.076 (0.003)   | <0.001   |                       |          |
| LGCS <sup>a</sup>            | -0.42 (0.31)    | 0.1727   |                       |          |
| LGCS x Time                  | 0.0073 (0.005)  | 0.1786   |                       |          |
| <b>Executive functioning</b> |                 |          |                       |          |
| Intercept                    | 2.69 (0.22)     | <0.001   | -1.340                | <0.001   |
| Time                         | -0.06 (0.003)   | <0.001   |                       |          |
| LGCS <sup>a</sup>            | 1.04 (0.256)    | <0.001   |                       |          |
| LGCS x Time                  | -0.0174 (0.005) | <0.001   |                       |          |
| <b>Memory</b>                |                 |          |                       |          |
| Intercept                    | 2.59 (0.14)     | <0.001   | -0.546                | <0.001   |
| Time                         | -0.06 (0.002)   | <0.001   |                       |          |
| LGCS <sup>a</sup>            | 0.68 (0.20)     | <0.001   |                       |          |
| LGCS x Time                  | -0.011 (0.003)  | 0.002    |                       |          |

The longitudinal submodel was adjusted for sex, large infarcts on MRI, lacunes on MRI, hypertension, diabetes mellitus, body mass index, smoking pack years and alcohol use at baseline. Models that estimated cognitive change in addition included education level and practice effect as covariates.

The survival submodel included LGCS, baseline age and sex as predictors.

Note that the time variable (i.e., age of patients at each visit) was not centered as negative values for the time variable are not compatible with the JM package.

<sup>a</sup>No LGCS as the reference category.

SE: standard error, LGCS: low-grade carotid stenosis, BPF: brain parenchymal fraction, CSFF: sulcal cerebrospinal fluid fraction, VF: ventricular fraction, WMH: white matter hyperintensity volume.

The estimates of the association parameters in the joint models for CSFF, VF, executive functioning and memory were statistically significant, indicating that death/dropout impacted change in CSFF, VF, executive functioning and memory throughout the follow-up period. This was not however the case for BPF and WMH.
